# Supplementary material
Source: MDPI journal article supplement (https://www.mdpi.com/2073-4344/10/1/22)
Supplement: s1 [file s1]

# Supporting information

## HCl Removal Using Calcined Ca-Mg-Al Layered Double Hydroxide in the Presence of CO<sub>2</sub> at Medium-high Temperature

Wei Wu<sup>1</sup>, Yuanfeng Wu<sup>2</sup>, Tongwei Wang<sup>1</sup>, Decheng Wang<sup>1</sup>, Qinyang Gu<sup>1</sup>, Baosheng Jin<sup>1,\*</sup>

<sup>1</sup> Key Laboratory of Energy Thermal Conversion and Control of Ministry of Education, School of Energy and Environment, Southeast University, Nanjing 210096, China; ww55rr44@163.com (W.W.); tongweiwang@seu.edu.cn (T.W.); dechengwang@seu.edu (D.W.); guqinyang@seu.edu.cn (Q.G.)

<sup>2</sup> School of Chemistry and Chemical Engineering, Southeast University, Nanjing 210096, China; wuyuanfeng2015@163.com

\* Correspondence: bsjin@seu.edu.cn; Tel.: +86-25-83794744

**Table S1.** BET Surface Area and Pore-size Distribution for CaMgAl-LDOs at different conditions

| sample                          | Surface area<br>(m <sup>2</sup> g <sup>-1</sup> ) | Pore Volume<br>(cm <sup>3</sup> g <sup>-1</sup> ) | Pore Diameter<br>(nm) |
|---------------------------------|---------------------------------------------------|---------------------------------------------------|-----------------------|
| Fresh sample                    | 29.824                                            | 0.086                                             | 11.634                |
| Calcined at 550 °C              | 31.654                                            | 0.093                                             | 18.972                |
| Calcined at 600 °C              | 34.757                                            | 0.108                                             | 23.037                |
| Calcined at 650 °C              | 31.293                                            | 0.089                                             | 15.682                |
| Calcined at 700 °C              | 28.761                                            | 0.078                                             | 9.664                 |
| Recovered CaMgAl-LDOs at 400 °C | 23.964                                            | 0.082                                             | 10.792                |
| Recovered CaMgAl-LDOs at 500 °C | 20.366                                            | 0.086                                             | 11.328                |
| Recovered CaMgAl-LDOs at 600 °C | 15.257                                            | 0.067                                             | 9.655                 |
| Recovered CaMgAl-LDOs at 700 °C | 10.091                                            | 0.017                                             | 3.214                 |
| Recovered CaMgAl-LDOs at 800 °C | 3.325                                             | 0.008                                             | 0.861                 |

The BET Surface Area and pore characteristics of all the samples were performed by N<sub>2</sub>-adsorption with the results being shown in **Table S1**. The BET Surface Area of the CaMgAl-LDOs increase from 31.654 m<sup>2</sup> g<sup>-1</sup> (550 °C) to 34.757 m<sup>2</sup> g<sup>-1</sup> (600 °C), followed by decreasing to 28.761 m<sup>2</sup> g<sup>-1</sup> (700°C), which may be associated with the sintering of CaMgAl-LDOs during the pretreatment. The BET Surface Area of the recovered CaMgAl-LDOs decrease from 23.964 m<sup>2</sup> g<sup>-1</sup> (400 °C) to only 3.325 m<sup>2</sup> g<sup>-1</sup>

(800 °C), which could be associated with the sintering effect and phase transformation of CaMgAl-LDOs during the adsorption process.
